# Supplementary material for: Mass filtering combined with photochemical derivatization enables high throughput mass spectrometric analysis of unsaturated phosphatidylcholine isomers
Source: Royal Society of Chemistry journal article supplement (doi:10.1039/d3ay01829f), 2023-11-07
Supplement: d3ay01829f1.pdf [file d3ay01829f1.pdf]

Electronic Supplementary Material (ESI) for Analytical Methods.

## Supporting information

Mass filtering combined with photochemical derivatization enables high throughput  
mass spectrometric analysis of unsaturated phosphatidylcholine isomers

Huimin Li<sup>a</sup>, Qian Xiong<sup>a</sup>, Hao Wu<sup>b,c</sup>, Yunmei Zhang<sup>c</sup>, Ke Zhuang<sup>c</sup>, Yan Zhao<sup>c,d</sup>, Hong Zhang<sup>\*c,d</sup>,  
and Lunzhao Yi<sup>\*,a,b</sup>

<sup>a</sup> Faculty of Food Science and Engineering, Kunming University of Science and Technology,  
Kunming, 650500, China.

<sup>b</sup> Faculty of Chemical Engineering, Kunming University of Science and Technology, Kunming,  
650500, China.

<sup>c</sup> Department of Cardiology, First People's Hospital of Yunnan Province, The Affiliated Hospital of  
Kunming University of Science and Technology, Kunming, 650000, China.

<sup>d</sup> College of medicine, Kunming University of Science and Technology, Kunming, 650500, China.

\*Correspondence: [yilunzhao@kust.edu.cn](mailto:yilunzhao@kust.edu.cn); [zhkhzx@yeah.net](mailto:zhkhzx@yeah.net)

云南省第一人民医院医学伦理委员会  
项目论证报告  
(正 本)

项 目 负 责 人: 张云梅

项 目 名 称: 心肌梗死 PCI 术后患者基于代谢组学的运动康  
复方案优化及机制研究

承 担 单 位: 云南省第一人民医院

- 一、伦理委员会对该课题方案进行了论证，并特别对以下三方面进行了认真讨论：
  - 1、研究对象的权利与利益；
  - 2、确保取得知情同意的措施；
  - 3、存在的危险与可能的受益。
- 二、同意实施该课题方案。实施过程中请使用经论证的知情同意书、问卷、说明信等材料。
- 三、课题方案如需修改，须事先经伦理委员会论证方可实施，修改内容及其原因需详细备案。
- 四、实施过程中如出现任何不良反应需立即向伦理委员会做出书面报告。

云南省第一人民医院医学伦理委员会

2019年12月27日

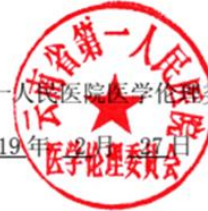

**Fig. S1** The ethical certification of this study

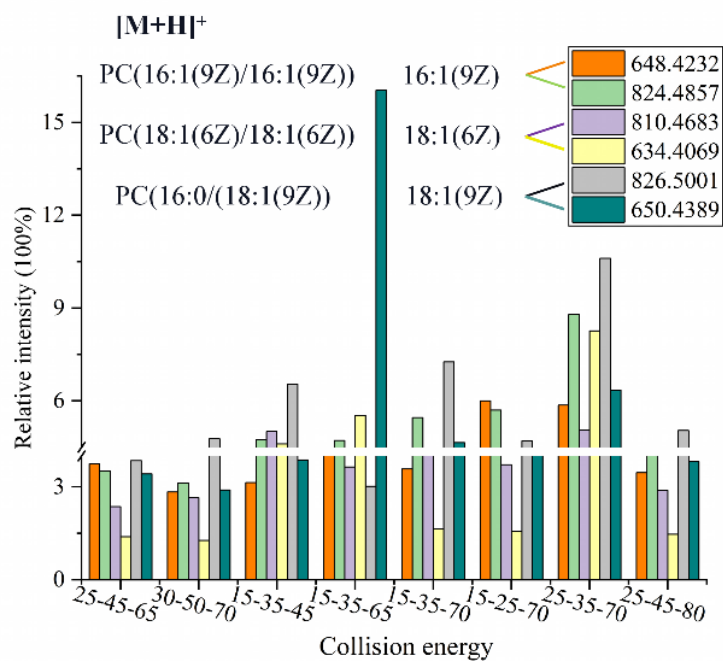

**Fig. S2** Optimization of collision voltage in positive ion mode.

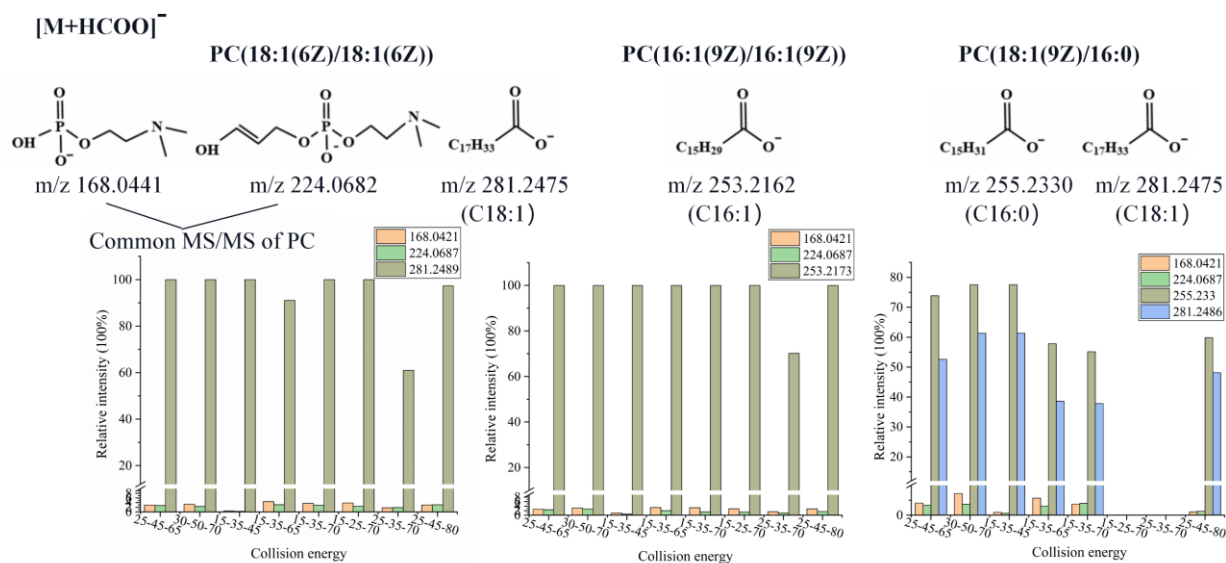

**Fig. S3** Optimization of collision voltage in negative ion mode.

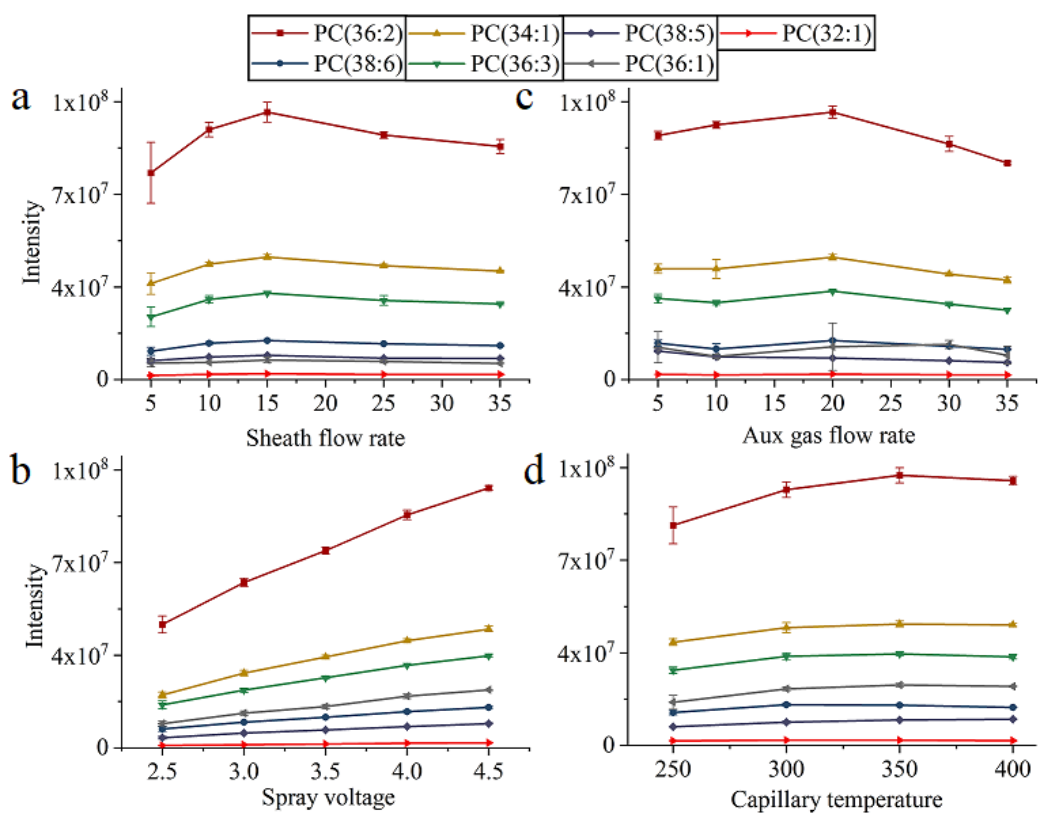

**Fig. S4** Optimization of ion source parameters. (a) Sheath flow rate. (b) Aux gas flow rate. (c) Spray voltage. (d) Capillary temperature.

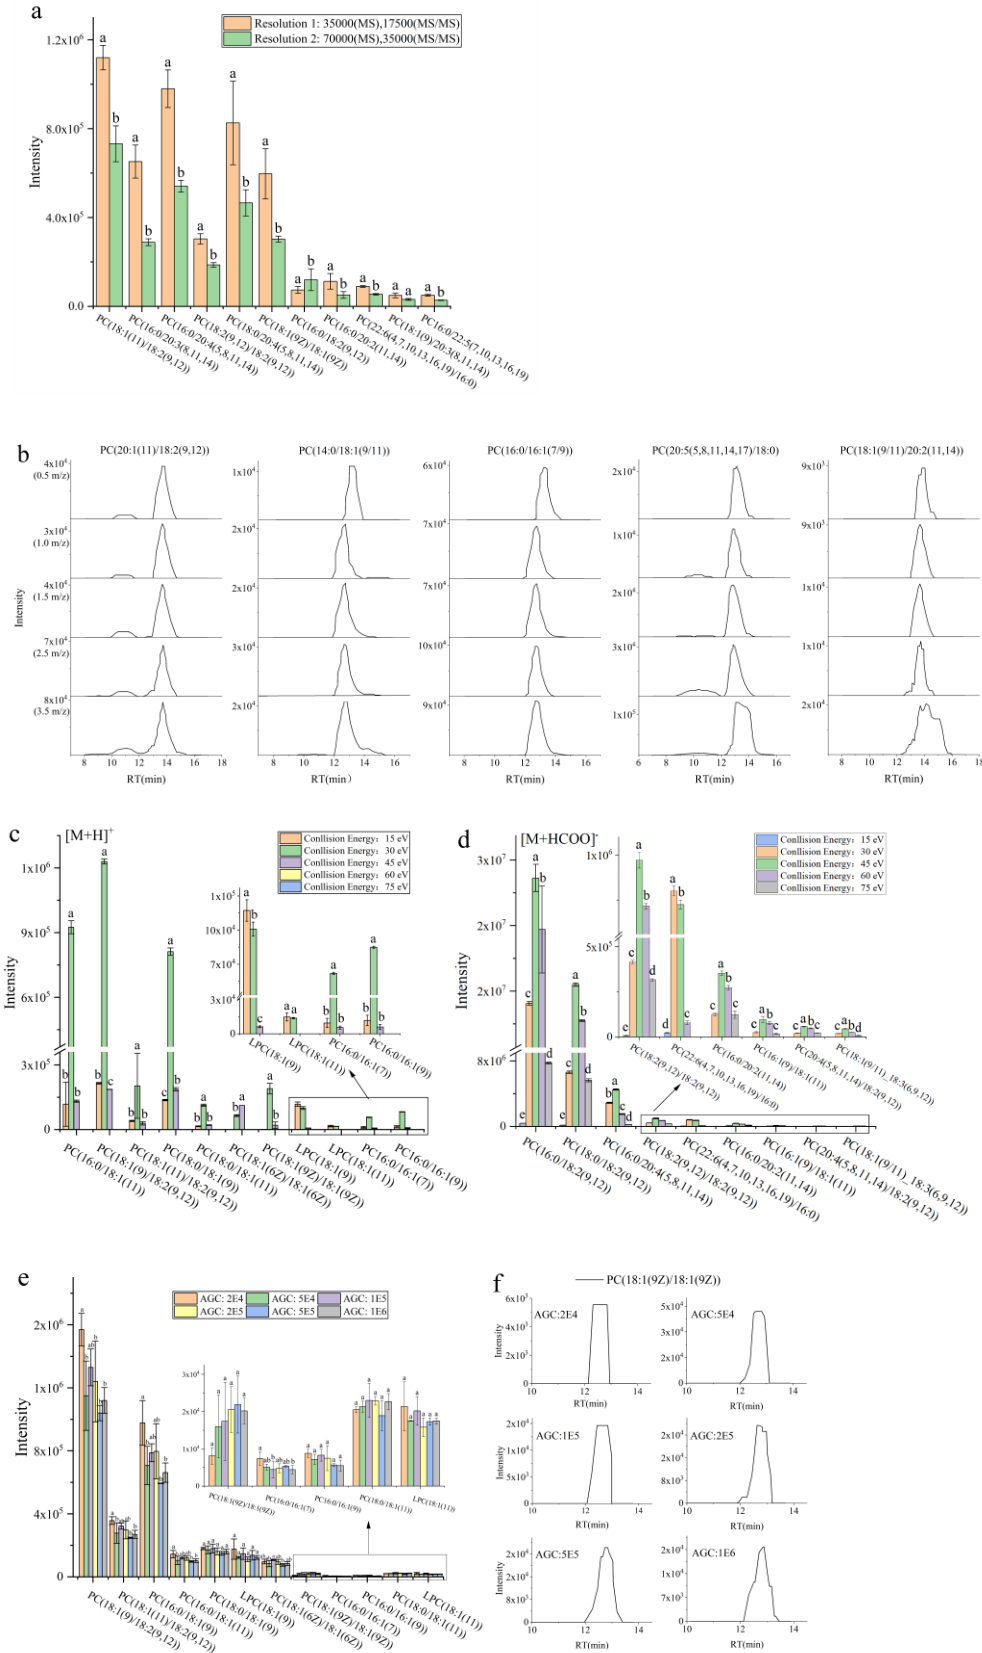

**Fig. S5** Effect of PRM parameters on the mass spectrum response of quantitative ions. (a) Resolution. (b) Isolation window. (c-d) Collision energy. (e) AGC. (f) Effect of AGC parameter on chromatographic peak shape.

**Table S1** The results of qualitative analysis of PCs in plasma

| No. | Name                  | Formula                                           | Calculated                           | Actual                  | RT<br>(min) | MS/MS <sup>+</sup>                                                                                                                                                     | MS/MS <sup>-</sup> |
|-----|-----------------------|---------------------------------------------------|--------------------------------------|-------------------------|-------------|------------------------------------------------------------------------------------------------------------------------------------------------------------------------|--------------------|
| 1   | LPC(18:2(9;12))       | C <sub>26</sub> H <sub>50</sub> NO <sub>7</sub> P | 520.3398a<br>728.3917a1<br>564.3296b | 728.3916a1<br>564.3317b | 1.9         | 184.0733(100);104.1074(56.96);<br>124.9999(10.53);412.2090(8.89);<br>452.2404(10.41);588.2721(2.83);<br>628.3040(3.23)                                                 | 279.2328(17.45)    |
| 2   | LPC(18:2(9;12))       | C <sub>26</sub> H <sub>50</sub> NO <sub>7</sub> P | 520.3398a<br>728.3917a1<br>564.3296b | 728.3911a1<br>564.3316b | 3.4         | 412.2089(15.49);452.2390(4.88);<br>588.2689(4.12);628.3063(4.82)                                                                                                       | 279.233(11.15)     |
| 3   | LPC(20:4(7,10,13,16)) | C <sub>28</sub> H <sub>50</sub> NO <sub>7</sub> P | 544.3398a<br>752.3917a1<br>588.3296b | 752.3919a1<br>588.3318b | 1.9         | 184.0734(100);124.9999(8.4);<br>104.1074(15.63);356.1464(0.81);<br>396.1785(1.61);436.2095(2.06);<br>476.2413(1.97); 572.2389(0.75);<br>612.2705(0.75); 652.3004(0.94) | 303.2334(100)      |
| 4   | LPC(20:4)             | C <sub>28</sub> H <sub>50</sub> NO <sub>7</sub> P | 544.3398a<br>588.3296b               | 544.3396a<br>588.3317b  | 3.2         | 184.0734(100);104.1074(95.15);1<br>24.9999(18.94)                                                                                                                      | 303.2339(100)      |
| 5   | LPC(17:1(8))          | C <sub>25</sub> H <sub>50</sub> NO <sub>7</sub> P | 508.3398a<br>716.3917a1<br>552.3296b | 716.3936a1              | 1.7         | 184.0732(16.27);124.9999(1.68);<br>86.0969(2.45);398.2307(0.95);<br>574.2905(1.66)                                                                                     | /                  |
| 6   | LPC(22:4(7,10,13,16)) | C <sub>30</sub> H <sub>54</sub> NO <sub>7</sub> P | 572.3711a<br>780.4230a1<br>616.3609b | 780.4254a1              | 1.7         | 184.0733(100);124.9999(7.97);<br>104.1073(3.61);386.2227(0.23);<br>424.1722(0.97);464.2036(1.34);<br>504.2364(2.06);600.2368(0.3);<br>640.2646(0.32); 680.2936(0.48)   | /                  |

|    |                                     |                                                   |                                      |                         |      |                                                                                      |                                   |
|----|-------------------------------------|---------------------------------------------------|--------------------------------------|-------------------------|------|--------------------------------------------------------------------------------------|-----------------------------------|
| 7  | LPC(18:1(9))*                       | C <sub>26</sub> H <sub>52</sub> NO <sub>7</sub> P | 522.3554a<br>730.4073a1<br>566.3452b | 730.4062a1<br>566.3474b | 1.8  | 184.0732(100);104.1073(76.77);1<br>24.9999(11.51);<br>412.2089(22.48);588.2715(4.52) | 281.2481(74.24)                   |
| 8  | LPC(18:1(11))                       | C <sub>26</sub> H <sub>52</sub> NO <sub>7</sub> P | 522.3554a<br>730.4073a1<br>566.3452b | 730.4062a1<br>566.3474b | 1.8  | 184.0732(100);104.1073(76.77);1<br>24.9999(11.51);440.2406(2.62);6<br>16.3058(0.97)  | 281.2481(74.24)                   |
| 9  | PC(34:1) <br>PC(16:0/18:1(9))*      | C <sub>42</sub> H <sub>82</sub> NO <sub>8</sub> P | 760.5851a<br>968.6370a1<br>804.5749b | 968.6364a1<br>804.5776b | 12.7 | 184.0732(100);124.9999(3.4);<br>104.1073(1.5);826.5004(0.15);<br>650.4388(18.03)     | 281.2482(100);<br>255.2326(39.25) |
| 10 | PC(34:1) <br>PC(16:0/18:1(11))      | C <sub>42</sub> H <sub>82</sub> NO <sub>8</sub> P | 760.5851a<br>968.6370a1<br>804.576b  | 968.6364a1<br>804.5776b | 12.9 | 184.0732(100);124.9999(3.4);<br>104.1073(1.5);678.4702(3.98);<br>854.5323(1.38)      | 281.2482(100);<br>255.2326(39.25) |
| 11 | PC(36:2) <br>PC(18:1(6Z)/18:1(6Z))* | C <sub>44</sub> H <sub>84</sub> NO <sub>8</sub> P | 786.6007a<br>994.6526a1<br>830.5917b | 994.6515a1<br>830.5930b | 11.8 | 184.0732(100);124.9999(5.44);<br>104.1073(11.56);634.4446(0.25)                      | 281.2487(100)                     |
| 12 | PC(36:2) <br>PC(18:1(9Z)/18:1(9Z))* | C <sub>44</sub> H <sub>84</sub> NO <sub>8</sub> P | 786.6007a<br>994.6526a1<br>830.5917b | 994.6515a1<br>830.5930b | 12.6 | 852.5167(2.52);676.4539(1.68)                                                        | 281.2487(100)                     |
| 13 | PC(36:2) <br>PC(18:0/18:2(9,12))    | C <sub>44</sub> H <sub>84</sub> NO <sub>8</sub> P | 786.6007a<br>994.6526a1<br>830.5917b | 994.6515a1<br>830.5930b | 12.9 | 678.4699(9.72);718.5015(4.79);<br>854.5321(3.09);894.5627(1.26)                      | 279.2328(100);<br>283.2642(41.73) |
| 14 | PC(36:2) <br>PC(16:0/20:2(11,14))   | C <sub>44</sub> H <sub>84</sub> NO <sub>8</sub> P | 786.6007a<br>994.6526a1<br>830.5917b | 994.6515a1<br>830.5930b | 12.9 | 678.4699(9.72);718.5015(4.79);<br>854.5321(3.09);894.5627(1.26)                      | 255.2323(2.63);<br>307.2642(4.31) |

|    |                                                |                                                   |                                       |                          |      |                                                                                                                                                                                                                                        |                                     |
|----|------------------------------------------------|---------------------------------------------------|---------------------------------------|--------------------------|------|----------------------------------------------------------------------------------------------------------------------------------------------------------------------------------------------------------------------------------------|-------------------------------------|
| 15 | PC(38:6) <br>PC(20:4(5,8,11,14)/18:2(9,12))    | C <sub>46</sub> H <sub>80</sub> NO <sub>8</sub> P | 806.5694a<br>1014.6213a1<br>850.5593b | 1014.6197a1<br>850.5615b | 12.2 | 184.0732(100);104.1072(0.79);<br>618.3765(0.41);658.4077(0.67);<br>698.4387(0.39);738.468(1.19);<br>874.4967(0.02); 914.5314(0.04)<br>620.3921(0.28);796.4548(0.18);<br>660.4233(3.11);836.4848(0.6);                                  | 279.2326(100);<br>303.2313(89.03)   |
| 16 | PC(38:6) <br>PC(18:1(9/11)/20:5(5,8,11,14,17)) | C <sub>46</sub> H <sub>80</sub> NO <sub>8</sub> P | 806.5694a<br>1014.6213a1<br>850.5593b | 1014.6197a1<br>850.5615b | 12.2 | 700.4545(2.94);876.5171(1.69);<br>740.4857(3.3);740.5524(0.08);<br>916.5487(1.42);916.8982(0.05);<br>780.5168(2.88);956.5796(1.58)<br>580.3605(1.35);756.556(0.37);<br>620.3921(0.28);796.4548(0.18);<br>660.4233(3.11);836.4848(0.6); | 281.2494(11.59);<br>301.2174(15.16) |
| 17 | PC(38:6) <br>PC(22:6(4,7,10,13,16,19)/16:0)    | C <sub>46</sub> H <sub>80</sub> NO <sub>8</sub> P | 806.5694a<br>1014.6213a1<br>850.5593b | 1014.6197a<br>850.5618b  | 12.8 | 700.4545(2.94);876.5171(1.69);<br>740.4857(3.3);740.5524(0.08);<br>916.5487(1.42); 916.8982(0.05);<br>780.5168(2.88);956.5796(1.58)                                                                                                    | 255.5329(100);<br>327.2326(77.88)   |
| 18 | PC(34:2)                                       | C <sub>42</sub> H <sub>80</sub> NO <sub>8</sub> P | 758.5694a<br>966.6213a1<br>802.5593b  | 966.6210a1<br>802.5615b  | 10.9 | 184.0735(100);125.0000(2.41);<br>104.1071(0.88)                                                                                                                                                                                        | /                                   |
| 19 | PC(34:2) <br>PC(16:1(9)/18:1(11))              | C <sub>42</sub> H <sub>80</sub> NO <sub>8</sub> P | 758.5694a<br>966.6213a1<br>802.5593b  | 966.6210a1<br>802.5615b  | 12.1 | 184.0733(100);124.9999(3.33);<br>104.1074(1.66);676.4502(0.03);<br>852.5161(0.04)                                                                                                                                                      | 253.2172(50.15);<br>281.2490(100)   |
| 20 | PC(34:2) <br>PC(16:0/18:2(9,12))*              | C <sub>42</sub> H <sub>80</sub> NO <sub>8</sub> P | 758.5694a<br>966.6213a1<br>802.5593b  | 966.6210a1<br>802.5615b  | 12.1 | 650.4388(6.65); 866.5316(3.68);<br>826.5007(2.97); 690.4697(2.59)                                                                                                                                                                      | 255.2348(39.78);<br>279.2315(100)   |



|    |                                          |                                                   |                                      |                         |      |                                                                                                                                                                                       |                                   |
|----|------------------------------------------|---------------------------------------------------|--------------------------------------|-------------------------|------|---------------------------------------------------------------------------------------------------------------------------------------------------------------------------------------|-----------------------------------|
| 21 | PC(36:4)                                 | C <sub>44</sub> H <sub>80</sub> NO <sub>8</sub> P | 782.5694a<br>990.6213a1<br>826.5593b | 990.6196a1              | 9.9  | 184.0733(100);124.9999(2.38);<br>104.1074(0.58)                                                                                                                                       | /                                 |
| 22 | PC(36:4) <br>PC(18:2(9,12)/18:2(9,12))*  | C <sub>44</sub> H <sub>80</sub> NO <sub>8</sub> P | 782.5694a<br>990.6213a1<br>826.5593b | 990.6196a1<br>826.5616b | 12.6 | 184.0733(100);124.9999(3.4);<br>104.1074(1.33);890.5326(4.41);<br>714.4701(1.45); 850.5004(2.02);<br>674.4384(3.56)                                                                   | 279.2324(100)                     |
| 23 | PC(36:4) <br>PC(18:1(9/11)_18:3(6,9,12)) | C <sub>44</sub> H <sub>80</sub> NO <sub>8</sub> P | 782.5694a<br>990.6213a1<br>826.5593b | 990.6196a1<br>826.5616b | 12.6 | 634.4079(2.19);674.4392(1.09);<br>714.4689(0.16);810.4691(2.58);<br>850.5011(3.96);890.5306(1.53)                                                                                     | 277.2177(3.26);<br>281.2489(3.54) |
| 24 | PC(36:4) <br>PC(16:1(9)_20:3(8,11,14))   | C <sub>44</sub> H <sub>80</sub> NO <sub>8</sub> P | 782.5694a<br>990.6213a1<br>826.5593b | 990.6196a1<br>826.5616b | 12.6 | 634.4079(2.19);674.4392(1.09);<br>714.4689(0.16);810.4691(2.58);<br>850.5011(3.96);890.5306(1.53)                                                                                     | 253.2170(0.39);<br>305.2497(0.99) |
| 25 | PC(36:4) <br>PC(16:0/20:4(5,8,11,14))    | C <sub>44</sub> H <sub>80</sub> NO <sub>8</sub> P | 782.5694a<br>990.6213a1<br>826.5593b | 990.6196a1<br>826.5618b | 13.1 | 184.0733(100);104.1073(1.46);<br>124.9999(3.61);594.3762(3.73);<br>634.4079(2.19);674.4392(1.09);<br>714.4689(0.16);770.438(0.5);<br>810.4691(2.58);850.5011(3.96);<br>890.5306(1.53) | 255.2327(65.84);<br>303.2328(100) |
| 26 | PC(36:3) <br>PC(18:1(11)/18:2(9,12))     | C <sub>44</sub> H <sub>82</sub> NO <sub>8</sub> P | 784.5851a<br>992.637a1<br>828.5749b  | 992.6353a1<br>828.5771b | 13.3 | 184.0733(100);104.1074(1.42);<br>124.9999(3.24);702.4694(0.35);<br>878.5294(0.18);676.454(4.7);<br>852.5166(1.44);716.4854(4.44);<br>892.5474(2.11)                                   | 279.233(100); 28<br>1.2485(44.66) |

|    |                                              |                                                   |                                      |                          |      |                                                                                                                                                                  |                                    |
|----|----------------------------------------------|---------------------------------------------------|--------------------------------------|--------------------------|------|------------------------------------------------------------------------------------------------------------------------------------------------------------------|------------------------------------|
| 27 | PC(36:3) <br>PC(18:1(9)/18:2(9,12))          | C <sub>44</sub> H <sub>82</sub> NO <sub>8</sub> P | 784.5851a<br>992.637a1<br>828.5749b  | 992.6353a1<br>828.5771b  | 13.3 | 674.4391(1.38);850.5017(0.86);<br>676.454(4.7);852.5166(1.44);<br>716.4854(4.44); 892.5474(2.11)                                                                 | 279.233(100); 28<br>1.2485(44.66)  |
| 28 | PC(36:3) <br>PC(16:0/20:3(8,11,14))          | C <sub>44</sub> H <sub>82</sub> NO <sub>8</sub> P | 784.5851a<br>992.637a1<br>828.5749b  | 992.6353a1<br>828.5771b  | 13.8 | 636.4217(1.4);812.482(0.35);<br>676.454(4.7);852.5166(1.44);<br>716.4854(4.44); 892.5474(2.11)                                                                   | 255.2328(47.8);<br>305.2478(100)   |
| 29 | PC(36:3) <br>PC(18:0/18:3(6,9,12))           | C <sub>44</sub> H <sub>82</sub> NO <sub>8</sub> P | 784.5851a<br>992.637a1<br>828.5749b  | 992.6353a1<br>828.5771b  | 13.8 | 636.4217(1.4);812.482(0.35);<br>676.454(4.7);852.5166(1.44);<br>716.4854(4.44);892.5474(2.11)<br>184.0734(100);124.9999(3.33);<br>104.1073(1.43);620.3929(0.85); | 277.2176(16.18);<br>283.2650(7.43) |
| 30 | PC(38:5) <br>PC(18:1(9/11)/20:4(5,8,11,14))  | C <sub>46</sub> H <sub>82</sub> NO <sub>8</sub> P | 808.5851a<br>1016.637a1<br>852.5749b | 1016.6346a1<br>852.5764b | 13.1 | 796.455(0.09);660.4243(1.48);<br>836.4809(1.17);700.4553(1.3);<br>876.519(1.09);740.4815(0.74);<br>916.5466(0.99)                                                | 281.2485(75.92);<br>303.2334(100)  |
| 31 | PC(38:5) <br>PC(18:1(9/11)/20:4(8,11,14,17)) | C <sub>46</sub> H <sub>82</sub> NO <sub>8</sub> P | 808.5851a<br>1016.637a1<br>852.5749b | 1016.6346a1<br>852.5764b | 13.1 | 662.4389(1.17);838.4987(0.3);<br>702.4706(1.37); 878.5322(0.61);<br>742.5029(1.42);918.5627(0.61);<br>782.5312(1.2); 958.5954(0.82)                              | 281.2485(75.92);<br>303.2334(100)  |
| 32 | PC(38:5) <br>PC(18:2(9,12)_20:3(8,11,14))    | C <sub>46</sub> H <sub>82</sub> NO <sub>8</sub> P | 808.5851a<br>1016.637a1<br>852.5749b | 1016.6346a1<br>852.5764b | 13.1 | 700.4553(1.3);876.519(1.09);<br>740.4815(0.74);916.5466(0.99);<br>660.4243(1.48); 836.4809(0.35)                                                                 | 279.2328(1.41);<br>305.2505(1.45)  |
| 33 | PC(38:5) <br>PC(16:0/22:5(7,10,13,16,19))    | C <sub>46</sub> H <sub>82</sub> NO <sub>8</sub> P | 808.5851a<br>1016.637a1<br>852.5749b | 1016.6346a1<br>852.5770b | 13.2 | 622.4086(0.92);798.4669(0.26);<br>662.4389(1.17);838.4987(0.3);<br>702.4706(1.37);878.5322(0.61);                                                                | 255.2329(77.27);<br>329.2483(100)  |

|    |                                          |                                                   |                                       |                          |      |                                                                                                                                                                                       |                                     |
|----|------------------------------------------|---------------------------------------------------|---------------------------------------|--------------------------|------|---------------------------------------------------------------------------------------------------------------------------------------------------------------------------------------|-------------------------------------|
|    |                                          |                                                   | 808.5851a                             |                          |      | 742.5029(1.42);918.5627(0.61);<br>782.5312(1.2); 958.5954(0.82)<br>622.4086(0.92);798.4669(0.26);<br>662.4389(1.17);838.4987(0.3);                                                    |                                     |
| 34 | PC(38:5) <br>PC(20:5(5,8,11,14,17)/18:0) | C <sub>46</sub> H <sub>82</sub> NO <sub>8</sub> P | 1016.637a1<br>852.5749b               | 1016.6346a1<br>852.5768b | 13.5 | 702.4706(1.37);878.5322(0.61);<br>742.5029(1.42);918.5627(0.61);<br>782.5312(1.2); 958.5954(0.82)                                                                                     | 283.2647(42.63);<br>301.2172(37.84) |
| 35 | PC(36:1) <br>PC(18:0/18:1)               | C <sub>44</sub> H <sub>86</sub> NO <sub>8</sub> P | 788.6164a<br>996.6683a1<br>832.6062b  | 996.6672a1<br>832.5983b  | 12.9 | 184.0732(100);124.9999(3.48);<br>104.1072(1.87);678.4700(1.38);<br>706.4984(0.12)                                                                                                     | 281.2486(100);<br>283.2641(37.47)   |
| 36 | PC(36:1) <br>PC(18:0/18:1(9))*           | C <sub>44</sub> H <sub>86</sub> NO <sub>8</sub> P | 788.6164a<br>996.6683a1<br>832.6062b  | 996.6672a1<br>832.6089b  | 13.9 | 184.0732(100);124.9999(3.48);<br>104.1072(1.87);678.4700(10.46);<br>854.5315(4.07)                                                                                                    | 281.2486(100);<br>283.2641(37.47)   |
| 37 | PC(36:1) <br>PC(18:0/18:1(11))           | C <sub>44</sub> H <sub>86</sub> NO <sub>8</sub> P | 788.6164a<br>996.6683a1<br>832.6062b  | 996.6672a1<br>832.6089b  | 13.9 | 706.4984(3.15); 882.5612(0.54)                                                                                                                                                        | 281.2486(100);<br>283.2641(37.47)   |
| 38 | PC(36:1) <br>PC(16:0/20:1(11))           | C <sub>44</sub> H <sub>86</sub> NO <sub>8</sub> P | 788.6164a<br>996.6683a1<br>832.6062b  | 996.6672a1<br>832.6089b  | 13.9 | 678.4700(10.46); 854.5315(4.07)                                                                                                                                                       | 255.2333(2.74);<br>309.2812(4.02)   |
| 39 | PC(38:4) <br>PC(18:1(9)/20:3(8,11,14))   | C <sub>46</sub> H <sub>84</sub> NO <sub>8</sub> P | 810.6007a<br>1018.6526a1<br>854.5906b | 1018.6510a1<br>854.5920b | 11.9 | 184.0732(100);124.9999(2.89);<br>104.1073(1.46);662.4366(0.36);<br>838.5018(0.04);700.4527(0.3);<br>876.501(0.05);702.4702(0.48);<br>878.5282(0.19);742.5004(1.87);<br>918.5589(0.33) | 305.2484(100);<br>281.2484(46.6)    |

|    |                                         |                                                   |                                       |                          |      |                                                                                                                                      |                                   |
|----|-----------------------------------------|---------------------------------------------------|---------------------------------------|--------------------------|------|--------------------------------------------------------------------------------------------------------------------------------------|-----------------------------------|
| 40 | PC(38:4) <br>PC(18:0/20:4(5,8,11,14))   | C <sub>46</sub> H <sub>84</sub> NO <sub>8</sub> P | 810.6007a<br>1018.6526a1<br>854.5906b | 1018.6506a1<br>854.5928b | 12.6 | 622.4070(2.59);662.4385(3.03);<br>702.4696(3.87);742.5003(6.32);<br>798.4685(0.08);838.5005(1.04);<br>878.5323(2.97); 918.5627(1.95) | 283.2639(69);<br>303.2332(100)    |
| 41 | PC(38:4) <br>PC(18:0/20:4(5,8,11,14))   | C <sub>46</sub> H <sub>84</sub> NO <sub>8</sub> P | 810.6007a<br>1018.6526a1<br>854.5906b | 1018.6512a1<br>854.5930b | 12.9 | 622.4070(2.59);662.4385(3.03);<br>702.4696(3.87);742.5003(6.32);<br>798.4685(0.08);838.5005(1.04);<br>878.5323(2.97); 918.5627(1.95) | 283.2639(69);<br>303.2332(100)    |
| 42 | PC(38:3) <br>PC(20:1(11)/(18:2(9,12))   | C <sub>46</sub> H <sub>86</sub> NO <sub>8</sub> P | 812.6164a<br>1020.6683a1<br>856.6062b | 1020.6671a1<br>856.5988b | 14.2 | 104.1073(1.29);664.4549(1.94);<br>704.4859(2.83);744.5153(1.33);<br>840.5173(1.62);880.5432(1.13);<br>920.5787(1.12)                 | 279.2327(100);<br>309.2729(38.32) |
| 43 | PC(38:3) <br>PC(18:1(9/11)/20:2(11,14)) | C <sub>46</sub> H <sub>86</sub> NO <sub>8</sub> P | 812.6164a<br>1020.6683a1<br>856.6062b | 1020.6671a1<br>856.5988b | 14.2 | 664.4549(1.94);704.4859(2.83);<br>744.5153(1.33);840.5173(1.62);<br>880.5432(1.13); 920.5787(1.12)                                   | 307.2646(13.55);<br>281.2487(9.8) |
| 44 | PC(38:3) <br>PC(18:0/20:3(8,11,14))     | C <sub>46</sub> H <sub>86</sub> NO <sub>8</sub> P | 812.6164a<br>1020.6683a1<br>856.6062b | 1020.6671a1<br>856.9085b | 15.1 | 664.4549(1.94);704.4859(2.83);<br>744.5153(1.33);840.5173(1.62);<br>880.5432(1.13); 920.5787(1.12)                                   | 283.2642(51.07);<br>305.2480(100) |
| 45 | PC(33:2) <br>PC(15:0/18:2(9,12))        | C <sub>41</sub> H <sub>78</sub> NO <sub>8</sub> P | 744.5538a<br>952.6057a1<br>788.5436b  | 952.6045a1<br>788.5449b  | 13.2 | 104.1072(1.12);636.4219(7.17);<br>676.4535(5.37);812.4849(1.68);<br>852.5136(1.77)                                                   | 279.2334(100);<br>241.2168(33.27) |
| 46 | PC(33:1) <br>PC(16:0/17:1(9))           | C <sub>41</sub> H <sub>80</sub> NO <sub>8</sub> P | 746.5694a<br>954.6213a1<br>790.5593b  | 954.6187a1<br>790.5621b  | 12.7 | 184.0734(100);125.0961(6.85);<br>650.4376(4.95)                                                                                      | 267.2327(64);<br>255.2327(34.63)  |

|    |                                            |                                                   |                                      |                          |      |                                                                                                                                                       |                                     |
|----|--------------------------------------------|---------------------------------------------------|--------------------------------------|--------------------------|------|-------------------------------------------------------------------------------------------------------------------------------------------------------|-------------------------------------|
| 47 | PC(33:1) <br>PC(15:0/18:1(9))              | C <sub>41</sub> H <sub>80</sub> NO <sub>8</sub> P | 746.5694a<br>954.6213a1<br>790.5593b | 954.6187a1<br>790.5621b  | 12.7 | 636.421(11.14)                                                                                                                                        | 281.2484(100);<br>241.2167(34.75)   |
| 48 | PC(36:5) <br>PC(18:3(9,12,15)/18:2(12,15)) | C <sub>44</sub> H <sub>78</sub> NO <sub>8</sub> P | 780.5538a<br>988.6057a1<br>824.5436b | 988.6024a1<br>824.5454b  | 12.0 | 184.0734(100);125.0000(3.05);<br>104.1073(0.38);674.4382(1.07);<br>714.4701(1.22); 754.4989(2.26);<br>850.503(0.52);890.5309(0.83);<br>930.5579(0.23) | 277.2127(63.7);<br>279.2327(100)    |
| 49 | PC(36:5) <br>PC(16:1(9)/20:4(8,11,14,17))  | C <sub>44</sub> H <sub>78</sub> NO <sub>8</sub> P | 780.5538a<br>988.6057a1<br>824.5436b | 988.6024a1<br>824.5454b  | 12.0 | 674.4382(1.07);714.4701(1.22);<br>754.4989(2.26); 810.466(0.14);<br>850.503(0.52);890.5309(0.83);<br>930.5579(0.23)                                   | 253.2172(27.57);<br>303.2331(32.72) |
| 50 | PC(36:5) <br>PC(20:5(5,8,11,14,17)/16:0)   | C <sub>44</sub> H <sub>78</sub> NO <sub>8</sub> P | 780.5538a<br>988.6057a1<br>824.5436b | 988.6024a1<br>824.5454b  | 12.4 | 594.3745(0.34);634.4053(1.55);<br>674.4382(1.07);714.4701(1.22);<br>754.4989(2.26);810.466(0.14);<br>850.503(0.52);890.5309(0.83);<br>930.5579(0.23)  | 255.2332(100);<br>301.2173(63.09)   |
| 51 | PC(36:5) <br>PC(16:0/20:5(5,8,11,14,17))   | C <sub>44</sub> H <sub>78</sub> NO <sub>8</sub> P | 780.5538a<br>988.6057a1<br>824.5436b | 988.6024a1<br>824.5454b  | 12.4 | 594.3745(0.34);634.4053(1.55);<br>674.4382(1.07);714.4701(1.22);<br>754.4989(2.26);810.466(0.14);<br>850.503(0.52);890.5309(0.83);<br>930.5579(0.23)  | 255.2332(90.22);<br>301.2173(100)   |
| 52 | PC(40:7) <br>PC(20:4/20:3)                 | C <sub>48</sub> H <sub>82</sub> NO <sub>8</sub> P | 832.5851a<br>1040.637a1<br>876.5749b | 1040.6342a1<br>876.5759b | 10.0 | /                                                                                                                                                     | 303.2328(7.17);<br>305.2489(16.03)  |

|    |                                                |                                                   |                                      |                          |      |                                                                                                                                                                                           |                                     |
|----|------------------------------------------------|---------------------------------------------------|--------------------------------------|--------------------------|------|-------------------------------------------------------------------------------------------------------------------------------------------------------------------------------------------|-------------------------------------|
| 53 | PC(40:7) <br>PC(22:6(4,7,10,13,16,19)/18:1(9)) | C <sub>48</sub> H <sub>82</sub> NO <sub>8</sub> P | 832.5851a<br>1040.637a1<br>876.5749b | 1040.6342a1<br>876.5759b | 13.3 | 125.0000(1.16);184.0732(49.8);<br>646.3991(0.16); 686.4349(0.35);<br>722.4378(0.33);726.4698(0.74);<br>766.5047(0.57);806.5314(0.65);<br>902.5279(0.11);942.5546(0.35);<br>982.5894(0.35) | 281.2490(100);<br>327.2337(62.08)   |
| 54 | PC(32:2) <br>PC(14:0/18:2(9,12))               | C <sub>40</sub> H <sub>76</sub> NO <sub>8</sub> P | 730.5381a<br>938.5900a1<br>774.5280b | 938.5912a1<br>774.5273b  | 11.2 | 104.1074(0.97);125.0001(3.57);<br>184.0734(100);622.4082(4.57);<br>662.4394(7.58);798.4676(0.87);<br>838.498(1.45)                                                                        | 227.2017(36.04);<br>279.2234(100)   |
| 55 | PC(32:2) <br>PC(16:1/16:1)                     | C <sub>40</sub> H <sub>76</sub> NO <sub>8</sub> P | 730.5381a<br>938.5900a1<br>774.5280b | 938.5912a1<br>774.5273b  | 11.2 | /                                                                                                                                                                                         | 253.2175(1.86)                      |
| 56 | PC(32:1) <br>PC(16:0/16:1(7))                  | C <sub>40</sub> H <sub>78</sub> NO <sub>8</sub> P | 732.5538a<br>940.6057a1<br>776.5436b | 940.6041a1<br>776.5451b  | 12.2 | 104.1074(0.65);124.9999(3.71);<br>184.0733(100);622.4056(6.95);<br>798.4661(0.56)                                                                                                         | 253.2175(100);<br>255.2330(26.73)   |
| 57 | PC(32:1) <br>PC(16:0/16:1(9))                  | C <sub>40</sub> H <sub>78</sub> NO <sub>8</sub> P | 732.5538a<br>940.6057a1<br>776.5436b | 940.6041a1<br>776.5451b  | 12.2 | 650.4388(12.12);826.5013(2.66)                                                                                                                                                            | 253.2175(100);<br>255.2330(26.73)   |
| 58 | PC(32:1) <br>PC(14:0/18:1(9/11))               | C <sub>40</sub> H <sub>78</sub> NO <sub>8</sub> P | 732.5538a<br>940.6057a1<br>776.5436b | 940.6041a1<br>776.5451b  | 12.2 | 650.4388(12.12);826.5013(2.66);<br>622.4056(6.95); 798.4661(0.56)                                                                                                                         | 227.2017(11.88);<br>281.2493(35.35) |
| 59 | PC(34:3) <br>PC(16:1(9)/18:2(9,12))            | C <sub>42</sub> H <sub>78</sub> NO <sub>8</sub> P | 756.5538a<br>964.6057a1<br>800.5436b | 964.6058a1<br>800.5460b  | 12.7 | 184.0734(100);104.1074(33.35);1<br>24.9999(4.93);646.4072(0.34);<br>648.4228(2.79);688.454(2.89);                                                                                         | 279.2335(100);<br>253.2175(40.08)   |

|    |                                    |                                                   |                                       |                         |      |                                                                                    |                                     |
|----|------------------------------------|---------------------------------------------------|---------------------------------------|-------------------------|------|------------------------------------------------------------------------------------|-------------------------------------|
|    |                                    |                                                   | 756.5538a                             |                         |      | 822.4533(0.14);824.4827(0.2);<br>864.5051(0.14)                                    |                                     |
| 60 | PC(34:3) <br>PC(16:0/18:3(6,9,12)) | C <sub>42</sub> H <sub>78</sub> NO <sub>8</sub> P | 964.6057a1<br>800.5436b               | 964.6055a1<br>800.5460b | 12.8 | 650.4387(1.91);688.454(2.89);<br>826.5007(0.51); 864.5051(0.14)                    | 277.2175(100);<br>255.2331(47.37)   |
| 61 | PC(35:2) <br>PC(16:0/19:2)         | C <sub>43</sub> H <sub>82</sub> NO <sub>8</sub> P | 772.5851a<br>980.637a1<br>816.5749b   | 816.6047b               | 12.8 | /                                                                                  | 255.2330(0.05);<br>293.2487(0.5)    |
| 62 | PC(35:2) <br>PC(17:1(9)/18:1(9))   | C <sub>43</sub> H <sub>82</sub> NO <sub>8</sub> P | 772.5851a<br>980.637a1<br>816.5749b   | 980.6365a1<br>816.6047b | 12.8 | 184.0734(100);104.1074(36.54);1<br>24.9999(3.57);704.4858(12.76);8<br>80.5452(1.3) | 267.234(0.32);<br>281.2493(1.22)    |
| 63 | PC(35:2) <br>PC(17:0/18:2(9,12))   | C <sub>43</sub> H <sub>82</sub> NO <sub>8</sub> P | 772.5851a<br>980.637a1<br>816.5749b   | 980.6365a1<br>816.6047b | 12.8 | 664.454(7.56);704.4858(12.76);<br>840.5149(2.16); 880.5452(1.3)                    | 269.2490(34.02);<br>279.2333(100)   |
| 64 | PC(35:1) <br>PC(17:0/18:1)         | C <sub>43</sub> H <sub>84</sub> NO <sub>8</sub> P | 774.6007a<br>982.6526a1<br>818.5917b  | 774.5997a<br>818.5919b  | 15.2 | 184.0733(100);124.9999(7.12);<br>104.1074(1.32)                                    | 281.2484(100);<br>269.2487(34.76)   |
| 65 | PC(35:1) <br>PC(16:0/19:1)         | C <sub>43</sub> H <sub>84</sub> NO <sub>8</sub> P | 774.6007a<br>982.6526a1<br>818.5917b  | 774.5997a<br>818.5919b  | 15.2 | 184.0733(100);124.9999(7.12);<br>104.1074(1.32)                                    | 255.2326(7.86);<br>295.2639(9.57)   |
| 66 | PC(38:7) <br>PC(20:5/18:2)         | C <sub>46</sub> H <sub>78</sub> NO <sub>8</sub> P | 804.5538a<br>1012.6057a1<br>848.5447b | 804.5508a<br>848.5439b  | 11.2 | 184.0733(100);124.9999(6.95);<br>104.1073(1.31)                                    | 279.2325(100);<br>301.2170(84.06)   |
| 67 | PC(38:7) <br>PC(18:3/20:4)         | C <sub>46</sub> H <sub>78</sub> NO <sub>8</sub> P | 804.5538a<br>1012.6057a1<br>848.5447b | 804.5508a<br>848.5439b  | 11.2 | 184.0733(100);124.9999(6.95);<br>104.1073(1.31)                                    | 277.2168(18.29);<br>303.2322(22.55) |

|    |                                    |                                                   |                                       |                          |      |                                                                                                                      |                                      |
|----|------------------------------------|---------------------------------------------------|---------------------------------------|--------------------------|------|----------------------------------------------------------------------------------------------------------------------|--------------------------------------|
| 68 | PC(38:7) <br>PC(22:6/16:1)         | C <sub>46</sub> H <sub>78</sub> NO <sub>8</sub> P | 804.5538a<br>1012.6057a1<br>848.5447b | 804.5508a<br>848.5439b   | 11.4 | 184.0733(100);124.9999(6.95);<br>104.1073(1.31)                                                                      | 253.2171(44.47);<br>327.2327(31.87)  |
| 69 | PC(38:2) <br>PC(18:0/20:2(11,14))  | C <sub>46</sub> H <sub>88</sub> NO <sub>8</sub> P | 814.6320a<br>1022.6839a1<br>858.6219b | 1022.6833a1<br>858.6241b | 13.6 | 184.0732(16.27);124.9999(1.68);<br>86.0969(2.45);706.4917(1.84);<br>882.5533(1.55);746.5191(1.58);<br>922.5818(1.69) | 283.2644(1.01);<br>307.2643(7.70)    |
| 70 | PC(38:2) <br>PC(18:1(12)/20:1(14)) | C <sub>46</sub> H <sub>88</sub> NO <sub>8</sub> P | 814.6320a<br>1022.6839a1<br>858.6219b | 1022.6833a1<br>858.6241b | 13.6 | 706.4917(1.84);882.5533(1.55);<br>746.5191(1.58);922.5818(1.69)                                                      | 281.2484(2.49);<br>309.2798(1.22)    |
| 71 | PC(36:6) <br>PC(24:1_12:5)         | C <sub>44</sub> H <sub>76</sub> NO <sub>8</sub> P | 778.5381a<br>986.5900a1<br>822.5280b  | 778.5381a<br>822.5286b   | 11.7 | 184.0734(100);124.9998(7.43);<br>104.1072(1.00)                                                                      | 365.3439(100)                        |
| 72 | PC(36:6) <br>PC(14:0/22:6)         | C <sub>44</sub> H <sub>76</sub> NO <sub>8</sub> P | 778.5381a<br>986.5900a1<br>822.5280b  | 778.5381a<br>822.5286b   | 11.7 | 184.0734(100);124.9998(7.43);<br>104.1072(1.00)                                                                      | 327.2330(67.57);<br>227.2012(12.45); |
| 73 | PC(36:6)                           | C <sub>44</sub> H <sub>76</sub> NO <sub>8</sub> P | 778.5381a<br>986.5900a1<br>822.5280b  | 778.5381a<br>822.5286b   | 11.8 | 184.0734(75.73);125.0000(3.54)                                                                                       | /                                    |
| 74 | PC(35:4) <br>PC(15:0/20:4)         | C <sub>43</sub> H <sub>78</sub> NO <sub>8</sub> P | 768.5538a<br>976.6057a1<br>812.5436b  | 768.5540a<br>766.5401b   | 13.3 | 184.0734(75.73);125.0000(4.87);<br>104.1072(0.67)                                                                    | 303.2336(100);<br>241.2178(63.833)   |
| 75 | PC(37:4) <br>PC(17:0/20:4)         | C <sub>45</sub> H <sub>82</sub> NO <sub>8</sub> P | 796.5851a<br>1004.637a1<br>840.5749b  | 796.5862a<br>840.5746b   | 13.4 | 184.0734(100);125.0000(8.46);<br>104.1072(1.05)                                                                      | 303.2333(100);<br>269.2486(59.87)    |



|    |                                                           |                                                   |                                       |                         |      |                                                   |                                     |
|----|-----------------------------------------------------------|---------------------------------------------------|---------------------------------------|-------------------------|------|---------------------------------------------------|-------------------------------------|
| 76 | PC(37:6) <br>PC(15:0/22:6)                                | C <sub>45</sub> H <sub>78</sub> NO <sub>8</sub> P | 792.5538a<br>1000.6057a1<br>836.5447b | 792.5524a<br>836.5441b  | 11.9 | 184.0732(100);124.9999(7.07)                      | 241.2170(25.74);<br>327.2327(41.48) |
| 77 | PC(37:6) <br>PC(15:0/22:6)                                | C <sub>45</sub> H <sub>78</sub> NO <sub>8</sub> P | 792.5538a<br>1000.6057a1<br>836.5447b | 792.5524a<br>836.5441b  | 12.4 | 184.0732(100);124.9999(7.07)                      | 241.2170(25.74);<br>327.2327(41.48) |
| 78 | PC(32:0) <br>PC(14:0/18:0)                                | C <sub>40</sub> H <sub>80</sub> NO <sub>8</sub> P | 734.5694a<br>778.5593b                | 734.5685a<br>778.5600b  | 15.0 | 184.0733(100);124.9998(8.78);<br>104.1072(1.29)   | 227.2016(0.09);<br>283.2639(0.34)   |
| 79 | PC(32:0) <br>PC(16:0/16:0)                                | C <sub>40</sub> H <sub>80</sub> NO <sub>8</sub> P | 734.5694a<br>778.5593b                | 734.5685a<br>778.5600b  | 15.0 | 184.0733(100);124.9998(8.78);<br>104.1072(1.29)   | 255.2326(100)                       |
| 80 | LPC(20:2)                                                 | C <sub>28</sub> H <sub>54</sub> NO <sub>7</sub> P | 548.3711a<br>756.423a1<br>592.3609b   | 756.4227a1              | 1.7  | 184.0733(100);125.0000(9.65);<br>104.1072(1.16)   | /                                   |
| 81 | LPC(22:5)                                                 | C <sub>30</sub> H <sub>52</sub> NO <sub>7</sub> P | 570.3554a<br>778.4073a1<br>614.3452b  | 778.4120a1              | 1.9  | 184.0733(100);124.9999(7.51);<br>104.1072(0.67)   | /                                   |
| 82 | PC(P-34:2/O-34:3) <br>PC(P-16:0_18:2)/<br>PC(O-16:1_18:2) | C <sub>42</sub> H <sub>80</sub> NO <sub>7</sub> P | 742.5745a<br>950.6264a1<br>786.5643b  | 950.6264a1<br>786.5662b | 14.7 | 184.0734(94.51);125.0000(4.87);<br>104.1072(0.67) | 279.2331(100)                       |
| 83 | PC(P-36:5)                                                | C <sub>44</sub> H <sub>78</sub> NO <sub>7</sub> P | 764.5589a<br>972.6108a1<br>762.5443b  | 764.5556a               | 13.2 | 184.0734(13.24)                                   | /                                   |
| 84 | PC(P-36:2/O-36:3)                                         | C <sub>44</sub> H <sub>84</sub> NO <sub>7</sub> P | 770.6058a<br>978.6577a1<br>814.5956b  | 770.6047a               | 15.4 | 184.0734(100);124.9999(6.55);<br>104.1074(1.21)   | /                                   |

|    |          |                                                   |                                                    |             |      |                                                 |   |
|----|----------|---------------------------------------------------|----------------------------------------------------|-------------|------|-------------------------------------------------|---|
| 85 | PC(37:3) | C <sub>45</sub> H <sub>84</sub> NO <sub>8</sub> P | 798.6007a<br>1006.6526a1<br>842.5906b<br>738.5068a | 1006.6516a1 | 12.2 | 184.07352(59.42)                                | / |
| 86 | PC(33:5) | C <sub>41</sub> H <sub>72</sub> NO <sub>8</sub> P | 946.5587a1<br>782.4967b<br>742.5381a               | 782.4971b   | 12.3 | /                                               | / |
| 87 | PC(33:3) | C <sub>41</sub> H <sub>76</sub> NO <sub>8</sub> P | 950.5900a1<br>786.5280b<br>742.5381a               | 742.5359a   | 11.9 | 184.0732(4.21)                                  | / |
| 88 | PC(33:3) | C <sub>41</sub> H <sub>76</sub> NO <sub>8</sub> P | 950.5900a1<br>786.5280b<br>764.5225a               | 742.5364a   | 12.7 | 184.0732(4.38)                                  | / |
| 89 | PC(35:6) | C <sub>43</sub> H <sub>74</sub> NO <sub>8</sub> P | 972.5744a1<br>808.5134b<br>766.5381a               | 764.5217a   | 12.1 | 184.0735(2.92)                                  | / |
| 90 | PC(35:5) | C <sub>43</sub> H <sub>76</sub> NO <sub>8</sub> P | 974.5900a1<br>810.5291b<br>790.5381a               | 766.5369a   | 11.9 | 184.0733(7.86)                                  | / |
| 91 | PC(37:7) | C <sub>45</sub> H <sub>76</sub> NO <sub>8</sub> P | 998.5900a1<br>834.5291b<br>790.5381a               | 790.5370a   | 11.6 | 184.0733(100);124.9999(6.95);<br>104.1073(1.85) | / |
| 92 | PC(37:7) | C <sub>45</sub> H <sub>76</sub> NO <sub>8</sub> P | 998.5900a1<br>834.5291b                            | 790.5370a   | 12.7 | 184.0733(100);124.9999(6.95);<br>104.1073(1.85) | / |

|     |                    |                                                   |                                                   |            |      |                                                    |   |
|-----|--------------------|---------------------------------------------------|---------------------------------------------------|------------|------|----------------------------------------------------|---|
| 93  | LPC(P-16:0/O-16:1) | C <sub>24</sub> H <sub>50</sub> NO <sub>6</sub> P | 480.3449a<br>688.3968a1<br>524.3347b              | 480.3446a  | 2.4  | 184.0733(8.55);124.9999(12.92);<br>104.1073(19.07) | / |
| 94  | LPC(P-16:0/O-16:1) | C <sub>24</sub> H <sub>50</sub> NO <sub>6</sub> P | 480.3449a<br>688.3968a1<br>524.3347b              | 480.3446a  | 4.6  | 184.0733(8.55);124.9999(12.92);<br>104.1073(19.07) | / |
| 95  | LPC(P-18:1/O-18:2) | C <sub>26</sub> H <sub>52</sub> NO <sub>6</sub> P | 506.3605a<br>714.4124a1<br>550.3503b<br>700.5276a | 714.4096a1 | 1.7  | 184.0734(100);124.9998(7.43);<br>104.1072(1.00)    | / |
| 96  | PC(P-31:2/O-31:3)  | C <sub>39</sub> H <sub>74</sub> NO <sub>7</sub> P | 908.5795a1<br>744.517b<br>702.5432a               | 700.5270a  | 12.7 | 184.0737(7.73)                                     | / |
| 97  | PC(P-31:1/O-31:2)  | C <sub>39</sub> H <sub>76</sub> NO <sub>7</sub> P | 910.5951a1<br>746.5330b<br>728.5589a              | 702.5364a  | 3.8  | 184.0730(35.5);124.9998(7.43);<br>104.1075(7.98)   | / |
| 98  | PC(P-33:2/O-33:3)  | C <sub>41</sub> H <sub>78</sub> NO <sub>7</sub> P | 772.5487b<br>738.5432a                            | 728.5568a  | 13.3 | 184.0731(7.58)                                     | / |
| 99  | PC(P-34:4/O-34:5)  | C <sub>42</sub> H <sub>76</sub> NO <sub>7</sub> P | 782.5330b<br>746.6058a                            | 738.0485a  | 9.7  | 184.0733(14.04)                                    | / |
| 100 | PC(P-34:0/O-34:1)  | C <sub>42</sub> H <sub>84</sub> NO <sub>7</sub> P | 790.5956b<br>748.5276a                            | 746.6044a  | 16.8 | 184.0733(100);124.9998(8.29);<br>104.1073(1.77)    | / |
| 101 | PC(P-35:6/O-35:7)  | C <sub>43</sub> H <sub>74</sub> NO <sub>7</sub> P | 792.5174b<br>764.5589a                            | 748.5264a  | 12.0 | 184.0732(10.58)                                    | / |
| 102 | PC(P-36:5/O-36:6)  | C <sub>44</sub> H <sub>78</sub> NO <sub>7</sub> P | 808.5487b<br>764.5581a                            | 764.5581a  | 12.7 | 104.1073(1.02);184.0733(100)                       | / |

|     |                    |                                                   |                                      |           |      |                                                 |   |
|-----|--------------------|---------------------------------------------------|--------------------------------------|-----------|------|-------------------------------------------------|---|
| 103 | PC(P-36:4/O-36:5)  | C <sub>44</sub> H <sub>80</sub> NO <sub>7</sub> P | 766.5745a<br>810.5643b               | 766.5734a | 13.6 | 184.0732(100);124.9998(7.64);<br>104.1073(1.16) | / |
| 104 | PC(P-36:3/O-36:4)  | C <sub>44</sub> H <sub>82</sub> NO <sub>7</sub> P | 768.5902a<br>812.5800b               | 768.5889a | 14.4 | 184.0733(100);124.9998(7.73);<br>104.1073(1.37) | / |
| 105 | PC(P-39:9/O-39:10) | C <sub>47</sub> H <sub>76</sub> NO <sub>7</sub> P | 798.5432a<br>842.5330b               | 798.5414a | 14.2 | 184.0733(100);124.9999(6.4);<br>104.1073(1.04)  | / |
| 106 | PC(P-38:6/O-38:7)  | C <sub>46</sub> H <sub>80</sub> NO <sub>7</sub> P | 790.5745a<br>834.5643b               | 790.5728a | 12.9 | 184.0733(100);124.9999(7.65);<br>104.1073(1.68) | / |
| 107 | PC(P-38:6/O-38:7)  | C <sub>46</sub> H <sub>80</sub> NO <sub>7</sub> P | 790.5745a<br>834.5643b               | 790.5728a | 13.3 | 184.0733(100);124.9999(7.65);<br>104.1073(1.68) | / |
| 108 | PC(P-37:6/O-37:7)  | C <sub>45</sub> H <sub>78</sub> NO <sub>7</sub> P | 776.5589a<br>820.5487b               | 776.5591a | 12.8 | 184.0733(34.35)                                 | / |
| 109 | PC P-18:0-22:2     | C <sub>48</sub> H <sub>92</sub> NO <sub>7</sub> P | 826.6684a<br>870.6582b               | 826.6661a | 18.2 | 184.0733(100);124.9999(5.01);<br>104.1074(2.01) | / |
| 110 | PC P-20:0-22:4     | C <sub>50</sub> H <sub>92</sub> NO <sub>7</sub> P | 850.6684a<br>894.6582b               | 850.6669a | 16.6 | 184.0733(100);124.9999(5.39);<br>104.1074(1.46) | / |
| 111 | PC(O-22:2/22:3)    | C <sub>52</sub> H <sub>96</sub> NO <sub>7</sub> P | 878.6997a<br>922.6906b               | 878.6985a | 18.6 | 184.0733(100);124.9999(3.99);<br>104.1074(1.21) | / |
| 112 | LPC(18:3)          | C <sub>26</sub> H <sub>48</sub> NO <sub>7</sub> P | 518.3241a<br>563.3218b<br>494.3241a  | 518.3214a | 1.9  | 184.0734(100);124.9999(9.0);<br>104.1074(3.89)  | / |
| 113 | LPC(16:1)          | C <sub>24</sub> H <sub>48</sub> NO <sub>7</sub> P | 516.3061a1<br>538.3139b<br>494.3241a | 494.3237a | 1.9  | 184.0734(100);124.9999(9.0);<br>104.1074(3.89)  | / |
| 114 | LPC(16:1)          | C <sub>24</sub> H <sub>48</sub> NO <sub>7</sub> P | 494.3241a<br>538.3139b               | 494.3239a | 1.7  | 184.0734(100);124.9999(9.5)                     | / |

|     |           |                                                   |                                                   |            |      |                                                   |   |
|-----|-----------|---------------------------------------------------|---------------------------------------------------|------------|------|---------------------------------------------------|---|
| 115 | LPC(17:4) | C <sub>25</sub> H <sub>44</sub> NO <sub>7</sub> P | 502.2928a<br>545.2760b                            | 502.2917a  | 1.7  | 184.0734(100);124.9999(8.06);<br>104.1073(0.97)   | / |
| 116 | LPC(20:5) | C <sub>28</sub> H <sub>48</sub> NO <sub>7</sub> P | 542.3241a<br>586.3139b                            | 542.3214a  | 1.9  | 184.0734(100);124.9999(8.06);<br>104.1073(0.97)   | / |
| 117 | LPC(20:5) | C <sub>28</sub> H <sub>48</sub> NO <sub>7</sub> P | 542.3241a<br>586.3139b                            | 542.3216a  | 1.7  | 184.0734(100);124.9999(8.06);<br>104.1073(0.97)   | / |
| 118 | LPC(20:3) | C <sub>28</sub> H <sub>52</sub> NO <sub>7</sub> P | 546.3554a<br>590.3452b                            | 546.3568a  | 1.8  | /                                                 | / |
| 119 | LPC(22:6) | C <sub>30</sub> H <sub>50</sub> NO <sub>7</sub> P | 568.3398a<br>612.3296b                            | 568.3391a  | 1.7  | 184.0734(98.59);104.1074(100);1<br>24.9999(29.60) | / |
| 120 | LPC(22:6) | C <sub>30</sub> H <sub>50</sub> NO <sub>7</sub> P | 568.3398a<br>612.3296b                            | 568.3394a  | 2.7  | 184.0734(100);104.1074(92.09);1<br>24.9999(27.25) | / |
| 121 | PC(31:1)  | C <sub>39</sub> H <sub>76</sub> NO <sub>8</sub> P | 718.5381a<br>762.5280b                            | 718.5363a  | 12.7 | 184.0732(83.26);124.9998(8.48)                    | / |
| 122 | LPC(22:1) | C <sub>30</sub> H <sub>60</sub> NO <sub>7</sub> P | 578.4180a<br>786.4699a1<br>622.4078b<br>550.3867a | 786.4726a1 | 12.0 | 184.0734(100);124.9998(7.61);<br>104.1072(0.67)   | / |
| 123 | LPC(20:1) | C <sub>28</sub> H <sub>56</sub> NO <sub>7</sub> P | 758.4386a1<br>594.3765b<br>550.3867a              | 758.4340a1 | 1.7  | /                                                 | / |
| 124 | LPC(20:1) | C <sub>28</sub> H <sub>56</sub> NO <sub>7</sub> P | 758.4386a1<br>594.3765b<br>634.4806a              | 758.4340a1 | 3.2  | /                                                 | / |
| 125 | LPC(26:1) | C <sub>34</sub> H <sub>68</sub> NO <sub>7</sub> P | 810.4686a1<br>678.4704b                           | 810.4739a1 | 1.7  | 184.0734(94.51);124.9998(7.61);<br>104.1072(0.67) | / |

|     |           |                                                   |                        |           |      |                                                     |   |
|-----|-----------|---------------------------------------------------|------------------------|-----------|------|-----------------------------------------------------|---|
| 126 | LPC(14:0) | C <sub>22</sub> H <sub>46</sub> NO <sub>7</sub> P | 468.3085a<br>512.2983b | 468.3080a | 1.9  | 184.0734(100);124.9998(7.61);<br>104.1072(0.67)     | / |
| 127 | LPC(14:0) | C <sub>22</sub> H <sub>46</sub> NO <sub>7</sub> P | 468.3085a<br>512.2983b | 468.3080a | 2.9  | 184.0734(100);124.9998(7.61);<br>104.1072(0.67)     | / |
| 128 | LPC(15:0) | C <sub>23</sub> H <sub>48</sub> NO <sub>7</sub> P | 482.3241a<br>526.3139b | 482.3239a | 1.9  | 184.0731(21.12);124.9998(17.61)<br>; 104.1072(6.19) | / |
| 129 | LPC(16:0) | C <sub>24</sub> H <sub>50</sub> NO <sub>7</sub> P | 496.3398a<br>540.3296b | 496.3389a | 1.8  | 184.0733(100);124.9998(31.09);<br>104.1072(92.96)   | / |
| 130 | LPC(18:0) | C <sub>26</sub> H <sub>54</sub> NO <sub>7</sub> P | 524.3711a<br>568.3609b | 524.3707a | 1.9  | 184.0733(100);124.9998(27.38);<br>104.1072(83.6)    | / |
| 131 | LPC(26:0) | C <sub>34</sub> H <sub>68</sub> NO <sub>8</sub> P | 650.4755a<br>694.4654b | 650.4756a | 11.3 | 184.0733(100);124.9998(27.38);<br>104.1072(83.6)    | / |
| 132 | PC(30:0)  | C <sub>38</sub> H <sub>76</sub> NO <sub>8</sub> P | 706.5381a<br>750.5280b | 706.5359a | 13.6 | 184.0733(100);124.9999(10.91);<br>104.1074(1.46)    | / |
| 133 | LPC(20:0) | C <sub>28</sub> H <sub>58</sub> NO <sub>7</sub> P | 552.4024a<br>596.3922b | 552.4021a | 8.6  | 184.0733(100);124.9999(19.7);<br>104.1074(57.98)    | / |
| 134 | PC(34:0)  | C <sub>42</sub> H <sub>84</sub> NO <sub>8</sub> P | 762.6007a<br>806.5906b | 762.5990a | 15.8 | 184.0733(100);124.9999(6.83);<br>104.1074(0.98)     | / |

Notes: a: [M+H]<sup>+</sup>; a1: [M\*<sup>+</sup>AQ+H]<sup>+</sup>; b: [M+HCOO]<sup>-</sup>; \*: Identified by standards.

**Table S2** Quantitative analysis results of PCs and its isomers in myocardial infarction patients after PCI before and after exercise rehabilitation

| No. | Name                                      | Before ( $\mu\text{g/mL}$ ) | After ( $\mu\text{g/mL}$ ) |
|-----|-------------------------------------------|-----------------------------|----------------------------|
| 1   | PC(20:5/18:2)                             | 0.0017 $\pm$ 0.0012         | 0.0020 $\pm$ 0.0019        |
| 2   | PC(18:3/20:4)                             | 0.0053 $\pm$ 0.0035         | 0.0054 $\pm$ 0.0039        |
| 3   | PC(22:6/16:1)                             | 0.0031 $\pm$ 0.0019         | 0.0033 $\pm$ 0.0022        |
| 4   | PC(18:3(9,12,15)/18:2(12,15))             | 0.0168 $\pm$ 0.0090         | 0.0192 $\pm$ 0.0093        |
| 5   | PC(16:1(9)/20:4(8,11,14,17))              | 0.0128 $\pm$ 0.0048         | 0.0150 $\pm$ 0.0060        |
| 6   | PC(20:5(5,8,11,14,17)/16:0)               | 0.0947 $\pm$ 0.0435         | 0.1025 $\pm$ 0.0658        |
| 7   | PC(20:4(5,8,11,14)/18:2(9,12))            | 0.0813 $\pm$ 0.0265         | 0.1004 $\pm$ 0.0302        |
| 8   | PC(18:1(9/11)/20:5(5,8,11,14,17))         | 0.0122 $\pm$ 0.0072         | 0.0125 $\pm$ 0.0081        |
| 9   | PC(22:6(4,7,10,13,16,19)/16:0)            | 0.5973 $\pm$ 0.2352         | 0.6462 $\pm$ 0.2463        |
| 10  | PC(14:0/18:2(9,12))                       | 0.0220 $\pm$ 0.0131         | 0.0204 $\pm$ 0.0120        |
| 11  | PC(16:1/16:1)                             | 0.0051 $\pm$ 0.0061         | 0.0053 $\pm$ 0.0046        |
| 12  | PC(20:4/20:3)                             | 0.0052 $\pm$ 0.0024         | 0.0061 $\pm$ 0.0032        |
| 13  | PC(22:6(4,7,10,13,16,19)/18:1(9))         | 0.0454 $\pm$ 0.0192         | 0.0487 $\pm$ 0.0214        |
| 14  | PC(16:1(9)/18:2(9,12))                    | 0.1620 $\pm$ 0.0666         | 0.1729 $\pm$ 0.0731        |
| 15  | PC(16:0/18:3(6,9,12))                     | 0.1566 $\pm$ 0.0738         | 0.1684 $\pm$ 0.0858        |
| 16  | PC(18:2(9,12)/18:2(9,12))                 | 1.0202 $\pm$ 0.5820         | 1.1266 $\pm$ 0.5061        |
| 17  | PC(18:1(9/11)_18:3(6,9,12))               | 0.0230 $\pm$ 0.0150         | 0.0232 $\pm$ 0.0139        |
| 18  | PC(16:1(9)_20:3(8,11,14))                 | 0.0156 $\pm$ 0.0089         | 0.0154 $\pm$ 0.0096        |
| 19  | PC(16:0/20:4(5,8,11,14))                  | 4.4770 $\pm$ 1.2495         | 5.3123 $\pm$ 1.7925        |
| 20  | PC(18:2(9,12)_20:3(8,11,14))              | 0.0254 $\pm$ 0.0133         | 0.0268 $\pm$ 0.0138        |
| 21  | PC(18:1(9/11)/20:4(5,8,11,14/8,11,14,17)) | 0.1939 $\pm$ 0.0671         | 0.2253 $\pm$ 0.0766        |
| 22  | PC(16:0/22:5(7,10,13,16,19))              | 0.1325 $\pm$ 0.0491         | 0.1421 $\pm$ 0.0541        |
| 23  | PC(20:5(5,8,11,14,17)/18:0)               | 0.0800 $\pm$ 0.0380         | 0.0793 $\pm$ 0.0507        |
| 24  | PC(14:0/18:1(9/11))                       | 0.0547 $\pm$ 0.0298         | 0.0499 $\pm$ 0.0246        |
| 25  | PC(16:0/16:1(7/9))                        | 0.1708 $\pm$ 0.1365         | 0.1807 $\pm$ 0.1275        |
| 26  | PC(16:1(9)/18:1(11))                      | 0.1358 $\pm$ 0.0687         | 0.1418 $\pm$ 0.0724        |
| 27  | PC(16:0/18:2(9,12))                       | 15.2542 $\pm$ 8.3693        | 15.6763 $\pm$ 6.7057       |
| 28  | PC(18:1(9/11)/18:2(9,12))                 | 1.9014 $\pm$ 0.6660         | 2.1623 $\pm$ 0.7335        |
| 29  | PC(16:0/20:3(8,11,14))                    | 2.0822 $\pm$ 0.8219         | 2.1071 $\pm$ 0.8346        |
| 30  | PC(18:0/18:3(6,9,12))                     | 0.0820 $\pm$ 0.0440         | 0.0887 $\pm$ 0.0582        |
| 31  | PC(18:1(11)/18:2(9,12))                   | 0.0030 $\pm$ 0.0013         | 0.0036 $\pm$ 0.0015        |
| 32  | PC(18:1(9)/18:2(9,12))                    | 0.0149 $\pm$ 0.0053         | 0.0182 $\pm$ 0.0058        |
| 33  | PC(18:1(9)/20:3(8,11,14))                 | 0.1462 $\pm$ 0.0572         | 0.1492 $\pm$ 0.0697        |
| 34  | PC(18:0/20:4(5,8,11,14))                  | 1.5743 $\pm$ 0.5048         | 1.7634 $\pm$ 0.5855        |
| 35  | PC(16:0/17:1(9))                          | 0.0209 $\pm$ 0.0113         | 0.0237 $\pm$ 0.0138        |
| 36  | PC(15:0/18:1(9))                          | 0.0693 $\pm$ 0.0415         | 0.0774 $\pm$ 0.0290        |
| 37  | PC(17:1(9)/18:1(9))                       | 0.0391 $\pm$ 0.0223         | 0.0484 $\pm$ 0.0189        |
| 38  | PC(17:0/18:2(9,12))                       | 0.0870 $\pm$ 0.0351         | 0.0965 $\pm$ 0.0348        |
| 39  | PC(18:1(9/11)/20:2(11,14))                | 0.0362 $\pm$ 0.0148         | 0.0411 $\pm$ 0.0179        |
| 40  | PC(20:1(11)/(18:2(9,12))                  | 0.1067 $\pm$ 0.0718         | 0.1102 $\pm$ 0.0535        |
| 41  | PC(18:0/20:3(8,11,14))                    | 1.6897 $\pm$ 0.7030         | 1.6224 $\pm$ 0.7101        |

|    |                       |                |                |
|----|-----------------------|----------------|----------------|
| 42 | PC(16:0/20:2(11,14))  | 0.2522±0.0867  | 0.2899±0.1053  |
| 43 | PC(18:0/18:2(9,12))   | 9.2844±3.3549  | 10.0203±3.0450 |
| 44 | PC(18:1(9Z)/18:1(9Z)) | 0.0020±0.0008  | 0.0023±0.0010  |
| 45 | PC(18:1(6Z)/18:1(6Z)) | 0.0021±0.0009  | 0.0025±0.0008  |
| 46 | PC(14:0/18:0)         | 0.0026±0.0018  | 0.0025±0.0018  |
| 47 | PC(16:0/16:0)         | 0.6294±0.2007  | 0.7168±0.2228  |
| 48 | PC(16:0/19:1)         | 0.0202±0.0080  | 0.0253±0.0100  |
| 49 | PC(17:0/18:1)         | 0.0450±0.0214  | 0.0543±0.0212  |
| 50 | PC(18:1(12)/20:1(14)) | 0.0299±0.0232  | 0.0320±0.0185  |
| 51 | PC(18:0/20:2(11,14))  | 0.1485±0.0649  | 0.1643±0.0683  |
| 52 | LPC(22:5)             | 0.0481±0.0283  | 0.0506±0.0344  |
| 53 | LPC(22:6)             | 0.1050±0.0545  | 0.1067±0.0656  |
| 54 | LPC(18:1(9))          | 0.0034±0.0017  | 0.0037±0.0020  |
| 55 | LPC(18:1(11))         | 0.0005±0.0003  | 0.0005±0.0003  |
| 56 | LPC(17:1(8))          | 0.0255±0.0113  | 0.0231±0.0114  |
| 57 | LPC(20:2)             | 0.0170±0.0072  | 0.0168±0.0078  |
| 58 | LPC(20:5)             | 0.1949±0.0897  | 0.2252±0.1128  |
| 59 | LPC(14:0)             | 0.0393±0.0189  | 0.0322±0.0155  |
| 60 | LPC(16:1)             | 0.0651±0.0280  | 0.0589±0.0273  |
| 61 | LPC(17:4)             | 0.1117±0.0795  | 0.1279±0.1069  |
| 62 | LPC(18:2(9;12))       | 1.0077±0.3940  | 1.1289±0.5624  |
| 63 | LPC(18:3)             | 0.4981±0.1645  | 0.5170±0.1507  |
| 64 | LPC(20:3)             | 0.2044±0.0721  | 0.2016±0.0640  |
| 65 | LPC(20:4(7,10,13,16)) | 0.6689±0.2725  | 0.7492±0.3860  |
| 66 | LPC(22:4(7,10,13,16)) | 0.0165±0.0108  | 0.0192±0.0155  |
| 67 | LPC(15:0)             | 0.0317±0.0127  | 0.0299±0.0134  |
| 68 | LPC(16:0)             | 16.5258±7.3837 | 15.0205±5.8038 |
| 69 | LPC(18:0)             | 4.2463±1.5466  | 4.2010±1.3364  |
| 70 | PC(35:6)              | 0.0978±0.0622  | 0.1082±0.0671  |
| 71 | PC(33:3)              | 0.0892±0.0386  | 0.1034±0.0432  |
| 72 | PC(16:0/18:1(9))      | 0.0121±0.0046  | 0.0140±0.0059  |
| 73 | PC(16:0/18:1(11))     | 0.0016±0.0006  | 0.0019±0.0008  |
| 74 | PC(15:0/20:4)         | 0.3302±0.1729  | 0.4190±0.1997  |
| 75 | PC(15:0/18:2(9,12))   | 0.3384±0.1289  | 0.3811±0.1666  |
| 76 | PC(18:0/18:1(9))      | 0.0058±0.0029  | 0.0061±0.0027  |
| 77 | PC(18:0/18:1(11))     | 0.0002±0.0001  | 0.0003±0.0002  |
| 78 | PC(P-36:3/O-36:4)     | 1.1441±0.4610  | 1.3924±0.5055  |
| 79 | PC(32:0)              | 0.9975±0.3590  | 1.1122±0.3225  |
| 80 | PC(38:6)              | 7.3380±2.7701  | 7.7769±2.7109  |
| 81 | PC(36:3)              | 12.9291±4.1810 | 14.2192±4.8725 |
| 82 | PC(35:2)              | 0.6925±0.2745  | 0.7918±0.2745  |
| 83 | PC(36:2)              | 23.0386±8.1337 | 25.7173±7.4218 |
| 84 | PC(35:1)              | 0.4721±0.2044  | 0.5247±0.1608  |

---



**Notes:** All values are mean  $\pm$  SD. PCs: phosphatidylcholines; PCI: Percutaneous Coronary Intervention.
